# Supplementary material
Source: PubMed Central journal article supplement (PMC552940)

**A.**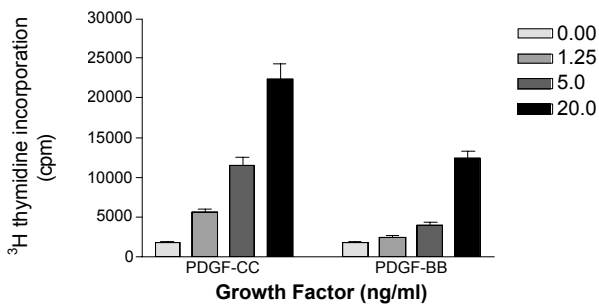**B.**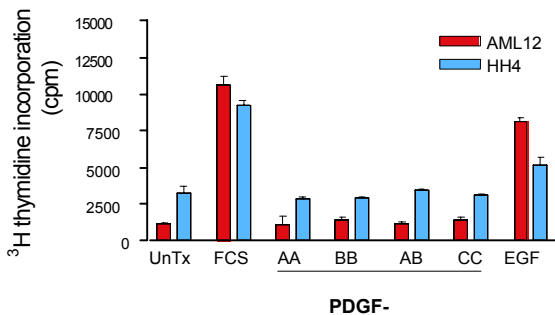

Supplement: pnas_102_9_3389__1.pdf [file pnas_102_9_3389__1.pdf]

H & E

$\alpha$ -SMA

Control

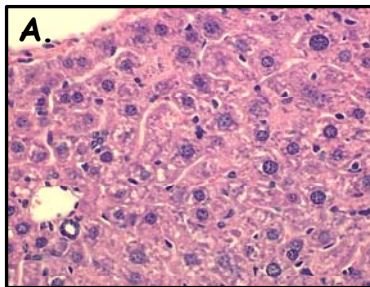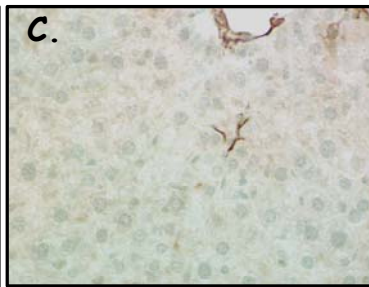

PDGF-C

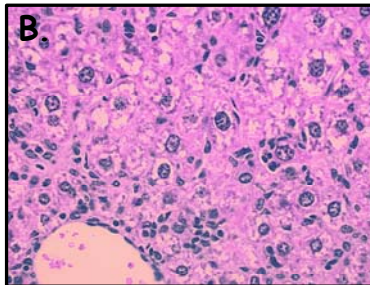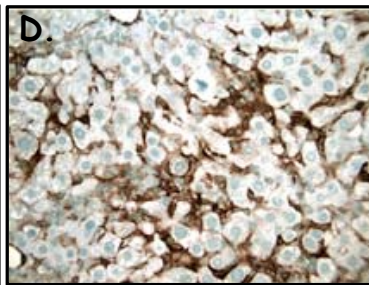

Supplement: pnas_102_9_3389__3.pdf [file pnas_102_9_3389__3.pdf]

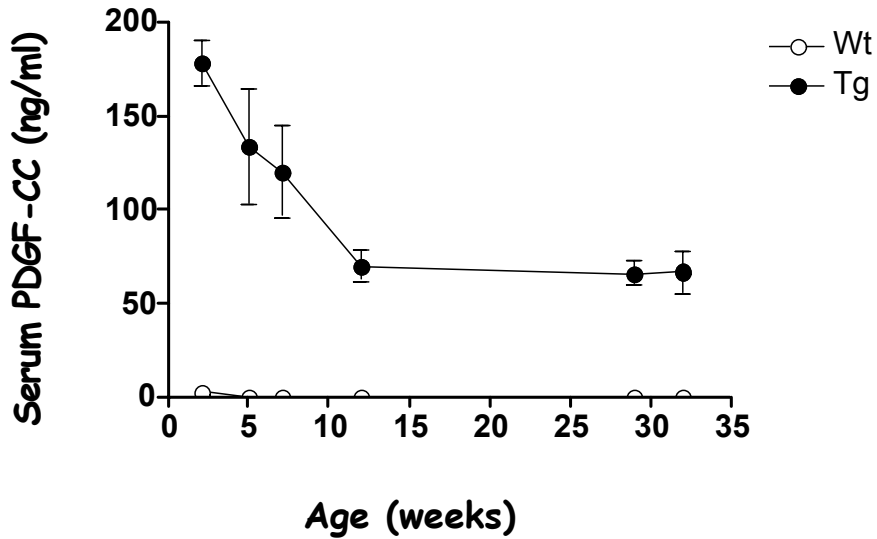

Supplement: pnas_102_9_3389__4.pdf [file pnas_102_9_3389__4.pdf]
